# Supplementary material for: Distribution of Polyphenolic and Isoprenoid Compounds and Biological Activity Differences between in the Fruit Skin + Pulp, Seeds, and Leaves of New Biotypes of Elaeagnusmultiflora Thunb
Source: MDPI journal article supplement (doi:10.3390/antiox10060849), 2021-05-26
Supplement: s1 [file s1]

# Distribution of Polyphenolic and Isoprenoid Compounds and Biological Activity Differences between in the Fruit Skin + Pulp, Seeds, and Leaves of New Biotypes of *Elaeagnus multiflora* Thunb.

Sabina Lachowicz-Wisniewska <sup>1\*</sup>, Ireneusz Kapusta <sup>2</sup>, Carla M. Stinco <sup>3</sup>, Antonio J. Meléndez-Martínez <sup>3</sup>, Anna Bieniek <sup>4</sup>, Ireneusz Ochmian <sup>5</sup> and Zygmunt Gil <sup>1</sup>

<sup>1</sup> Department of Fermentation and Cereals Technology, Wrocław University of Environmental and Life Science, Chelmońskiego 37, 51-630 Wrocław, Poland; sabina.lachowicz@upwr.edu.pl

<sup>2</sup> Department of Food Technology and Human Nutrition, Faculty of Biology and Agriculture, Rzeszów University, Zelwerowicza 4, 35-601 Rzeszów, Poland; ikapustai@ur.edu.pl

<sup>3</sup> Food Colour and Quality Laboratory, Area of Nutrition and Food Science, Universidad de Sevilla, 41012 Seville, Spain; cstinco@us.es; ajmelendez@us.es

<sup>4</sup> Department of Horticulture, University of Warmia and Mazury, Prawocheńskiego 21, 10-720 Olsztyn, Poland; anna.bieniek@uwm.edu.pl

<sup>5</sup> Department of Horticulture, West Pomeranian University of Technology in Szczecin, Słowackiego 17, 71-434 Szczecin, Poland; ireneusz.ochmian@zut.edu.pl

\* Correspondence: sabina.lachowicz@upwr.edu.pl

**Table S1.** Polyphenolic compound content in the seeds of cherry silverberry (mg/100 g d.w.).

| Compounds                                         | Si0           | Si1           | Si2           | Si3           | Si4          | Si5          |
|---------------------------------------------------|---------------|---------------|---------------|---------------|--------------|--------------|
| Kaempferol-tri-hexoside                           | 0.21 ± 0.04b  | 0.16 ± 0.03b  | Tr            | Tr            | 0.43 ± 0.09a | Tr           |
| Kaempferol-tri-hexoside-rhamnoside                | 0.06 ± 0.01b  | 0.05 ± 0.01b  | Tr            | Tr            | 0.17 ± 0.03a | Tr           |
| Kaempferol glucopyranoside-rhamnoside-deoxyhexose | 0.12 ± 0.02b  | 0.09 ± 0.02b  | Tr            | Tr            | 0.40 ± 0.08a | Tr           |
| Kaempferol-rhamnoside-dihexoside                  | Tr            | Tr            | Tr            | Tr            | 0.31 ± 0.06a | Tr           |
| Kaempferol-glucoside-dirhamnoside                 | 3.45 ± 0.69c  | 2.62 ± 0.52e  | 3.98 ± 0.80b  | 3.97 ± 0.79b  | 3.06 ± 0.61d | 4.55 ± 0.91a |
| Trigalloyl-hexoside                               | 1.51 ± 0.30b  | 1.15 ± 0.23c  | 1.47 ± 0.29b  | 1.29 ± 0.26c  | 0.97 ± 0.19d | 1.81 ± 0.36a |
| Trigalloyl-hexoside                               | 0.55 ± 0.11c  | 0.42 ± 0.08d  | 0.67 ± 0.13b  | 0.45 ± 0.09d  | 0.80 ± 0.16a | 0.59 ± 0.12c |
| Kaempferol-hexoside-pentoside-rhamnose            | 1.20 ± 0.24b  | 0.91 ± 0.18c  | 1.15 ± 0.23b  | 1.05 ± 0.21c  | 0.42 ± 0.08d | 1.31 ± 0.26a |
| Kaempferol glucopyranoside-dihexoside             | 0.67 ± 0.13a  | 0.51 ± 0.10b  | 0.64 ± 0.13a  | 0.49 ± 0.1c   | 0.14 ± 0.03d | 0.68 ± 0.14a |
| Trigalloyl-hexahydroxydiphenoyl                   | 0.10 ± 0.02a  | 0.08 ± 0.02b  | 0.13 ± 0.03a  | 0.08 ± 0.02b  | 0.07 ± 0.01b | 0.06 ± 0.01c |
| Digalloyl-gallagyl-hexoside                       | 0.13 ± 0.03c  | 0.10 ± 0.02c  | 0.23 ± 0.05b  | 0.09 ± 0.02d  | 0.37 ± 0.07a | 0.14 ± 0.03c |
| Tetragalloyl-hexoside                             | 0.12 ± 0.02b  | 0.09 ± 0.02c  | 0.13 ± 0.03b  | 0.11 ± 0.02b  | 0.04 ± 0.01d | 0.16 ± 0.03a |
| Kaempferol-di-hexoside                            | 0.44 ± 0.09b  | 0.33 ± 0.07c  | 0.40 ± 0.08b  | 0.31 ± 0.06c  | 0.48 ± 0.10a | 0.19 ± 0.04d |
| Tetragalloyl-hexoside                             | 0.13 ± 0.03c  | 0.10 ± 0.02c  | 0.08 ± 0.02d  | 0.32 ± 0.06a  | 0.16 ± 0.03b | 0.09 ± 0.02d |
| Unspecified quercetin derivative                  | 0.37 ± 0.07a  | 0.28 ± 0.06b  | 0.28 ± 0.06b  | 0.30 ± 0.06b  | 0.13 ± 0.03d | 0.25 ± 0.05c |
| Pentagalloyl-hexoside                             | 0.36 ± 0.07a  | 0.27 ± 0.05c  | 0.38 ± 0.08a  | 0.36 ± 0.07a  | 0.04 ± 0.01d | 0.34 ± 0.07b |
| Pentagalloyl-hexoside                             | 0.79 ± 0.16c  | 0.60 ± 0.12d  | 0.84 ± 0.17b  | 0.77 ± 0.15c  | 0.47 ± 0.09e | 0.89 ± 0.18a |
| Polymeric procyanidins                            | 1951 ± 3a     | 1904 ± 3b     | 1781 ± 3c     | 437 ± 1e      | 1342 ± 2d    | 160 ± 1f     |
| Degree of polymerization                          | 13.96 ± 2.79a | 10.61 ± 2.12d | 11.24 ± 2.25c | 12.46 ± 2.49b | 6.78 ± 1.36e | 2.04 ± 0.41f |
| Sum (mg/100 g d.w.)                               | 1961 ± 3a     | 1912 ± 38b    | 1791 ± 3c     | 447 ± 1e      | 1351 ± 2d    | 171 ± 1f     |

<sup>1</sup> Values are means ± standard deviation; <sup>2</sup> a–f: Means-SD followed by different letters within the same line represent significant differences ( $p < 0.05$ ).

**Table S2.** Polyphenolic compound content in the skin + pulp of cherry silverberry (mg/100 g d.w.).

| Compounds                                 | Si0          | Si1          | Si2          | Si3          | Si4          | Si5          |
|-------------------------------------------|--------------|--------------|--------------|--------------|--------------|--------------|
| Quercetin-rhamnoside-pentoside-rutinoside | 2.13 ± 0.43e | 1.70 ± 0.34f | 3.82 ± 0.76b | 2.57 ± 0.51c | 2.31 ± 0.46d | 4.8 ± 0.96a  |
| Sinapic acid-O-glucoside                  | 0.71 ± 0.14e | 0.57 ± 0.11f | 2.20 ± 0.44b | 1.21 ± 0.24d | 2.39 ± 0.48a | 1.89 ± 0.38c |
| Kaempferol-pentoside-rutinoside           | 0.35 ± 0.07d | 0.28 ± 0.06e | 0.50 ± 0.10b | 0.41 ± 0.08c | 0.33 ± 0.07d | 0.57 ± 0.11a |
| Quercetin-pentoside-rutinoside            | 1.33 ± 0.27e | 1.06 ± 0.21f | 2.44 ± 0.49c | 1.80 ± 0.36d | 2.63 ± 0.53b | 3.03 ± 0.61a |

|                                                                |               |               |              |               |               |               |
|----------------------------------------------------------------|---------------|---------------|--------------|---------------|---------------|---------------|
| Quercetin-3- <i>O</i> -rhamnoside-7- <i>O</i> -pentoside       | 1.18 ± 0.24d  | 0.94 ± 0.19e  | 1.31 ± 0.26c | 0.82 ± 0.16f  | 3.11 ± 0.62a  | 2.29 ± 0.46b  |
| Kaempferol-rhamnoside-rutinoside                               | 1.85 ± 0.37d  | 1.48 ± 0.30e  | 2.99 ± 0.60b | 2.35 ± 0.47c  | 1.32 ± 0.26f  | 3.28 ± 0.66a  |
| Quercetin-tri-rhamnoside                                       | 0.82 ± 0.16d  | 0.66 ± 0.13f  | 1.49 ± 0.30a | 1.28 ± 0.26b  | 0.74 ± 0.15e  | 1.11 ± 0.22c  |
| Quercetin-rhamnoside-glucopyranoside-rhamnoside                | 4.56 ± 0.91d  | 3.64 ± 0.73f  | 6.18 ± 1.24b | 5.00 ± 1.00c  | 4.29 ± 0.86e  | 7.24 ± 1.45a  |
| Isorhamnetin-7- <i>O</i> -rutinoside                           | 1.18 ± 0.24d  | 0.94 ± 0.19f  | 1.33 ± 0.27c | 1.11 ± 0.22e  | 2.84 ± 0.57a  | 1.63 ± 0.33b  |
| Isorhamnetin-3- <i>O</i> -glucoside                            | 1.04 ± 0.21d  | 0.83 ± 0.17e  | 1.77 ± 0.35a | 1.26 ± 0.25c  | 1.42 ± 0.28b  | 1.48 ± 0.3b   |
| Isorhamnetin 3- <i>O</i> -(6''-malonyl)-glucuronide-rhamnoside | 1.41 ± 0.28d  | 1.13 ± 0.23e  | 2.39 ± 0.48b | 1.78 ± 0.36c  | 3.46 ± 0.69a  | 2.37 ± 0.47b  |
| Kaempferol-3- <i>O</i> -(6''-p-coumaryl)-glucoside             | 1.87 ± 0.37c  | 1.49 ± 0.30d  | 2.28 ± 0.46a | 1.95 ± 0.39b  | 1.29 ± 0.26e  | 1.86 ± 0.37c  |
| Kaempferol 3- <i>O</i> -(6''-caffeoyl)-glucoside               | 0.59 ± 0.12c  | 0.47 ± 0.09d  | 0.71 ± 0.14b | 0.56 ± 0.11c  | 1.54 ± 0.31a  | 0.57 ± 0.11c  |
| Kaempferol-3- <i>O</i> -(6''-p-coumaryl)-glucoside             | 0.78 ± 0.16d  | 0.62 ± 0.12e  | 1.03 ± 0.21b | 0.85 ± 0.17c  | 1.11 ± 0.22a  | 0.87 ± 0.17c  |
| Polymeric procyanidins                                         | 799 ± 1b      | 632 ± 1d      | 586 ± 1e     | 2069 ± 4a     | 739 ± 1c      | 384 ± 1f      |
| Degree of polimerization                                       | 12.62 ± 0.25b | 10.08 ± 0.20d | 9.46 ± 0.19e | 11.23 ± 0.22c | 10.65 ± 0.21d | 16.43 ± 0.33a |
| Sum (mg/100 g d.w.)                                            | 819 ± 1b      | 648 ± 1d      | 617 ± 1e     | 2092 ± 4a     | 768 ± 1c      | 417 ± 1f      |

<sup>1</sup> Values are means ± standard deviation; <sup>2</sup> a–f: Means-SD followed by different letters within the same line represent significant differences ( $p < 0.05$ ).

**Table S3.** Polyphenolic compound content in the leaves of cherry silverberry (mg/100 g d.w.).

| Compounds                                                 | Si0            | Si1           | Si2            | Si3           | Si4           | Si5           |
|-----------------------------------------------------------|----------------|---------------|----------------|---------------|---------------|---------------|
| Qunic acid                                                | 1.03 ± 0.21d   | 1.76 ± 0.35a  | 1.35 ± 0.27b   | 1.18 ± 0.24c  | 0.97 ± 0.19d  | 1.20 ± 0.24c  |
| 3- <i>p</i> -Coumaroyloqunic acid                         | 2.39 ± 0.48e   | 7.24 ± 1.45a  | 4.33 ± 0.87b   | 3.19 ± 0.64d  | 2.09 ± 0.42f  | 3.45 ± 0.69c  |
| Methyl-quercetin 3- <i>O</i> -rhamnoside-pentoside        | 1.63 ± 0.33a   | 1.59 ± 0.32b  | 1.63 ± 0.33a   | 1.27 ± 0.25c  | 0.57 ± 0.11d  | 1.29 ± 0.26c  |
| Quercetin glycoside-pentoside-glycoside                   | 1.79 ± 0.36f   | 7.23 ± 1.45a  | 4.01 ± 0.8d    | 4.86 ± 0.97c  | 2.14 ± 0.43e  | 5.29 ± 1.06b  |
| Kaempferol 3- <i>O</i> -rutinoside-7- <i>O</i> -glucoside | 0.35 ± 0.07c   | 0.96 ± 0.19a  | 0.95 ± 0.19a   | 0.94 ± 0.19a  | 0.35 ± 0.07c  | 0.89 ± 0.18b  |
| Kaempferol di-rhamnoside-di-glucoside                     | 0.75 ± 0.15d   | 1.24 ± 0.25b  | 1.31 ± 0.26a   | 1.30 ± 0.26a  | 0.45 ± 0.09e  | 1.15 ± 0.23c  |
| Quercetin pentoside-rutinoside                            | 0.21 ± 0.04e   | 0.88 ± 0.18a  | 0.40 ± 0.08d   | 0.55 ± 0.11c  | 0.46 ± 0.09d  | 0.67 ± 0.13b  |
| Kaempferol 7- <i>O</i> -pentoside                         | 0.46 ± 0.09d   | 0.74 ± 0.15b  | 0.73 ± 0.15b   | 0.80 ± 0.16a  | 0.33 ± 0.07e  | 0.63 ± 0.13c  |
| Kaempferol 3- <i>O</i> -rhamnoside                        | 0.42 ± 0.08d   | 0.70 ± 0.14a  | 0.52 ± 0.10c   | 0.57 ± 0.11b  | 0.45 ± 0.09d  | 0.55 ± 0.11b  |
| Kaempferol glucoside-rutinoside                           | 1.52 ± 0.30a   | 1.26 ± 0.25b  | 1.29 ± 0.26b   | 1.51 ± 0.30a  | 1.02 ± 0.20c  | 1.18 ± 0.24c  |
| Sinapic acid- <i>O</i> -glucoside                         | 1.50 ± 0.30f   | 3.34 ± 0.67c  | 3.28 ± 0.66d   | 3.67 ± 0.73b  | 6.33 ± 1.27a  | 3.10 ± 0.62e  |
| Kaempferol pentoside-rhamnoside-rutinoside                | 2.56 ± 0.51a   | 2.25 ± 0.45b  | 2.01 ± 0.40c   | 2.24 ± 0.45b  | 2.08 ± 0.42c  | 2.26 ± 0.45b  |
| Quercetin 3- <i>O</i> -rutinoside                         | 1.82 ± 0.36e   | 5.82 ± 1.16a  | 4.28 ± 0.86c   | 4.91 ± 0.98b  | 4.05 ± 0.81d  | 5.02 ± 1.00b  |
| Quercetin rhamnoside-pentoside-rhamnoside                 | 2.09 ± 0.42c   | 2.18 ± 0.44b  | 1.00 ± 0.20f   | 1.38 ± 0.28e  | 3.21 ± 0.64a  | 1.82 ± 0.36d  |
| Quercetin 3- <i>O</i> -rhamnoside                         | 0.84 ± 0.00c   | 1.08 ± 0.00b  | 1.00 ± 0.00b   | 1.03 ± 0.00b  | 1.74 ± 0.00a  | 1.08 ± 0.00b  |
| Kaempferol rhamnoside-rutinoside                          | 0.66 ± 0.01d   | 1.92 ± 0.04b  | 2.09 ± 0.04a   | 1.94 ± 0.04b  | 1.80 ± 0.04c  | 1.92 ± 0.04b  |
| Kaempferol rhamnoside-pentoside-rutinoside                | 1.87 ± 0.00d   | 2.87 ± 0.01b  | 2.86 ± 0.01b   | 2.73 ± 0.01c  | 3.01 ± 0.01a  | 1.50 ± 0.00e  |
| Kaempferol pentoside-rutinoside                           | 24.31 ± 0.05d  | 27.04 ± 0.05c | 28.9 ± 0.06b   | 27.06 ± 0.05c | 38.56 ± 0.08a | 27.87 ± 0.06c |
| Kaempferol rhamnoside-pentoside                           | 1.86 ± 0.37d   | 2.44 ± 0.49a  | 2.04 ± 0.41c   | 2.42 ± 0.48a  | 2.30 ± 0.46b  | 2.40 ± 0.48a  |
| Kaempferol 3- <i>O</i> -rutinoside                        | 2.08 ± 0.00d   | 5.84 ± 0.01a  | 5.15 ± 0.01c   | 5.13 ± 0.01c  | 1.22 ± 0.00e  | 5.44 ± 0.01c  |
| Kaempferol di-rhamnoside-di-glycoside                     | 1.81 ± 0.36d   | 0.49 ± 0.10f  | 4.42 ± 0.88c   | 4.52 ± 0.90b  | 1.31 ± 0.26e  | 5.53 ± 1.11a  |
| Quercetin- <i>O</i> -glucoside- <i>O</i> -pentoside       | 1.66 ± 0.33d   | 2.81 ± 0.56c  | 3.06 ± 0.61b   | 1.10 ± 0.22f  | 3.78 ± 0.76a  | 1.29 ± 0.26e  |
| Kaempferol di-rhamnoside-glucoside                        | 109.31 ± 2.19a | 93.21 ± 1.86d | 100.83 ± 2.02b | 100.7 ± 2.01b | 74.04 ± 1.48  | 96.59 ± 1.93c |
| Kaempferol di-rhamnoside-glucoside                        | 3.44 ± 0.69b   | 1.15 ± 0.23e  | 1.24 ± 0.25d   | 2.96 ± 0.59c  | 3.96 ± 0.79a  | 1.18 ± 0.24e  |
| Quercetin di-rhamnose                                     | 13.40 ± 2.68c  | 15.75 ± 3.15a | 13.12 ± 2.62c  | 14.93 ± 2.99b | 6.05 ± 1.21d  | 15.17 ± 3.03a |
| Kaempferol pentoside-rhamnoside-glucuronide               | 2.01 ± 0.40e   | 3.90 ± 0.78a  | 3.09 ± 0.62c   | 2.26 ± 0.45d  | 1.99 ± 0.40f  | 3.69 ± 0.74b  |
| Kaempferol di-rhamnoside-hexoside                         | 1.02 ± 0.20c   | 1.24 ± 0.25b  | 0.90 ± 0.18e   | 0.96 ± 0.19d  | 4.02 ± 0.80a  | 1.07 ± 0.21c  |
| Kaempferol pentoside-di-rhamnoside                        | 2.91 ± 0.58b   | 1.17 ± 0.23c  | 1.07 ± 0.21d   | 1.07 ± 0.21d  | 3.39 ± 0.68a  | 1.17 ± 0.23c  |
| Kaempferol di-rhamnose                                    | 38.75 ± 0.78a  | 34.26 ± 0.69d | 37.14 ± 0.74b  | 38.69 ± 0.77a | 27.68 ± 0.55e | 36.85 ± 0.74c |
| Kaempferol-3- <i>O</i> -glucoside                         | 1.20 ± 0.24c   | 1.35 ± 0.27b  | 1.34 ± 0.27b   | 1.31 ± 0.26b  | 2.02 ± 0.40a  | 1.19 ± 0.24c  |
| Kaempferol glucoside-glucuronide                          | 0.41 ± 0.08f   | 2.12 ± 0.42c  | 2.27 ± 0.45b   | 1.96 ± 0.39d  | 1.51 ± 0.30e  | 2.34 ± 0.47a  |
| Eriodictyol glucoside-pentoside                           | 0.50 ± 0.10d   | 1.94 ± 0.39b  | 1.58 ± 0.32c   | 0.11 ± 0.02e  | 0.50 ± 0.10d  | 2.07 ± 0.41a  |
| Kaempferol malonyl-glucuronide                            | 0.39 ± 0.08c   | 0.39 ± 0.08c  | 0.35 ± 0.07d   | 1.75 ± 0.35a  | 0.34 ± 0.07d  | 0.50 ± 0.10b  |
| Unknown derivatives of Kaempferol                         | 0.25 ± 0.05e   | 1.62 ± 0.32a  | 0.58 ± 0.12c   | 0.66 ± 0.13b  | 0.32 ± 0.06d  | 0.25 ± 0.05e  |
| Kaempferol 3- <i>O</i> -rhamnoside                        | 0.29 ± 0.06d   | 0.27 ± 0.05d  | 1.16 ± 0.23a   | 0.70 ± 0.14b  | 0.29 ± 0.06d  | 0.51 ± 0.10c  |
| Kaempferol 3- <i>O</i> -(6''-p-coumaryl)-galactoside      | 0.91 ± 0.18b   | 0.49 ± 0.10c  | 0.25 ± 0.05e   | 1.34 ± 0.27a  | 0.31 ± 0.06d  | 0.21 ± 0.04f  |
| Kaempferol 3- <i>O</i> -(6''-caffeoyl)-glucoside          | 0.55 ± 0.11a   | 0.20 ± 0.04d  | 0.38 ± 0.08b   | 0.25 ± 0.05d  | 0.37 ± 0.07b  | 0.30 ± 0.06c  |
| Kaempferol 3- <i>O</i> -(6''-p-coumaryl)-glucoside        | 0.27 ± 0.05c   | 0.03 ± 0.01e  | 0.16 ± 0.03d   | 0.32 ± 0.06b  | 0.16 ± 0.03d  | 0.41 ± 0.08a  |
| Polymeric procyanidins                                    | 912 ± 2a       | 422 ± 1c      | 436 ± 1b       | 308 ± 1e      | 259 ± 1f      | 383 ± 1d      |
| Degree of polimerization                                  | 6.57 ± 0.13a   | 4.97 ± 0.10c  | 5.8 ± 0.12b    | 4.88 ± 0.10c  | 2.99 ± 0.06d  | 2.66 ± 0.05e  |

|                     |           |          |          |          |          |          |
|---------------------|-----------|----------|----------|----------|----------|----------|
| Sum (mg/100 g d.w.) | 1142 ± 2a | 662 ± 1c | 678 ± 2b | 552 ± 1d | 464 ± 2e | 622 ± 1c |
|---------------------|-----------|----------|----------|----------|----------|----------|

<sup>1</sup> Values are means ± standard deviation; <sup>2</sup> a–f: Means-SD followed by different letters within the same line represent significant differences ( $p < 0.05$ ).

**Table S4.** Antioxidant activity and in vitro enzymatic activity of new cultivars of cherry silverberry.

| Part        | Biotypes | Antioxidant Activity (mmol<br>TE/100 g d.w.) |                    | Antidiabetic Activity IC <sub>50</sub> (mg/mL) |                       |                      |
|-------------|----------|----------------------------------------------|--------------------|------------------------------------------------|-----------------------|----------------------|
|             |          | FRAP                                         | ABTS               | $\alpha$ -Amylase                              | $\alpha$ -Glucosidase | Pancreatic<br>Lipase |
|             |          |                                              |                    |                                                |                       |                      |
| Skin + Pulp | Si0      | 5.38 ± 0.02a                                 | 6.65 ± 0.33a       | 31.08 ± 0.06e                                  | 44.92 ± 0.09e         | 77.82 ± 0.16e        |
|             | Si1      | 2.06 ± 0.00d                                 | 4.80 ± 0.10d       | 23.40 ± 0.05d                                  | 26.87 ± 0.05c         | 75.84 ± 0.15d        |
|             | Si2      | 2.72 ± 0.01c                                 | 6.47 ± 0.13c       | 33.25 ± 0.07f                                  | 43.99 ± 0.09d         | 79.57 ± 0.16f        |
|             | Si3      | 4.69 ± 0.01b                                 | 7.70 ± 0.15b       | 19.71 ± 0.04c                                  | 22.78 ± 0.05b         | 69.05 ± 0.14b        |
|             | Si4      | 1.63 ± 0.00e                                 | 4.30 ± 0.09e       | 17.04 ± 0.03b                                  | 23.04 ± 0.05b         | 72.33 ± 0.14c        |
|             | Si5      | 1.38 ± 0.00e                                 | 3.55 ± 0.07f       | 13.04 ± 0.03a                                  | 18.04 ± 0.05a         | 59.33 ± 0.14a        |
| Seeds       | Si0      | 13.99 ± 0.03c                                | 37.88 ± 0.76a      | 81.99 ± 0.16e                                  | 102.45 ± 0.20e        | 123.41 ± 0.25e       |
|             | Si1      | 14.60 ± 0.03b                                | 31.56 ± 0.63b      | 67.50 ± 0.14b                                  | 86.71 ± 0.17c         | 105.67 ± 0.21b       |
|             | Si2      | 14.71 ± 0.03b                                | 30.24 ± 0.60c      | 78.93 ± 0.16d                                  | 92.33 ± 0.18d         | 103.42 ± 0.21a       |
|             | Si3      | 11.68 ± 0.02d                                | 23.56 ± 0.47e      | 75.41 ± 0.15c                                  | 92.91 ± 0.19d         | 107.88 ± 0.22c       |
|             | Si4      | 8.26 ± 0.02e                                 | 15.62 ± 0.31f      | 66.20 ± 0.13a                                  | 80.77 ± 0.16a         | 101.24 ± 0.20a       |
|             | Si5      | 17.39 ± 0.03a                                | 28.35 ± 0.57d      | 65.18 ± 0.13a                                  | 83.49 ± 0.17b         | 111.52 ± 0.22d       |
| Leaves      | Si0      | 13.51 ± 0.03b                                | 32.95 ± 0.66a      | 87.51 ± 0.18d                                  | 125.53 ± 0.25e        | 219.12 ± 0.44d       |
|             | Si1      | 10.15 ± 0.02d                                | 21.48 ± 0.43e      | 65.89 ± 0.13c                                  | 78.28 ± 0.16c         | 213.55 ± 0.43c       |
|             | Si2      | 12.70 ± 0.03c                                | 25.28 ± 0.51c      | 93.63 ± 0.19e                                  | 119.31 ± 0.24d        | 224.05 ± 0.45e       |
|             | Si3      | 10.94 ± 0.02e                                | 24.52 ± 0.49d      | 55.50 ± 0.11b                                  | 68.40 ± 0.14b         | 194.43 ± 0.39a       |
|             | Si4      | 15.15 ± 0.03a                                | 29.14 ± 0.58b      | 47.98 ± 0.10a                                  | 66.79 ± 0.13a         | 203.67 ± 0.41b       |
|             | Si5      | 15.95 ± 0.03a                                | 21.22 ± 0.42e      | 47.98 ± 0.10a                                  | 66.79 ± 0.13a         | 203.67 ± 0.41b       |
| Skin + Pulp |          | 3.97 <sup>c</sup>                            | 7.25 <sup>c</sup>  | 23.59 <sup>a</sup>                             | 30.77 <sup>a</sup>    | 74.49 <sup>a</sup>   |
| Seeds       | Mean     | 13.44 <sup>a</sup>                           | 27.87 <sup>a</sup> | 72.54 <sup>c</sup>                             | 89.78 <sup>c</sup>    | 108.86 <sup>b</sup>  |
| Leaves      |          | 13.07 <sup>b</sup>                           | 25.76 <sup>b</sup> | 66.42 <sup>b</sup>                             | 87.51 <sup>b</sup>    | 209.75 <sup>c</sup>  |

<sup>1</sup> Values are means ± standard deviation; <sup>2</sup> a–f: Means-SD followed by different letters within the same line represent significant differences ( $p < 0.05$ ).
